# Supplementary material for: Minimally Invasive Pancreaticoduodenectomy in Elderly versus Younger Patients: A Meta-Analysis
Source: MDPI journal article supplement (doi:10.3390/cancers16020323), 2024-01-11
Supplement: s1 [file s1]

| n. | Author     | Age (range or SD)            | <i>p</i> -value   | Gender (M/F)     | <i>p</i> -value | BMI          | <i>p</i> -value | Total Bilirubin (mmol/L) | <i>p</i> -value | CA 19.9 U/ml   | <i>p</i> -value | Pre-op Biliary drainage(%) | <i>p</i> -value |
|----|------------|------------------------------|-------------------|------------------|-----------------|--------------|-----------------|--------------------------|-----------------|----------------|-----------------|----------------------------|-----------------|
| 1  | Buchs [21] | 76.8 (70-82) vs 56.3 (24-69) | <b>&lt;0.0001</b> | 8/7 vs 12/14     | 0.75            | 27.5 vs 28.2 | 0.69            | NA                       | -               | NA             | -               | 20 vs 34.6                 | 0.48            |
| 2  | Liang [10] | 74.0 (4.0) vs 59.0 (9.0)     | <b>&lt;0.0001</b> | 16/11 vs 30/25   | 0.81            | 22.0 vs 22.0 | 0.41            | NA                       | -               | NA             | -               | NA                         | -               |
| 3  | Cai [22]   | 75.2 (3.9) vs 56.1 (9.4)     | <b>&lt;0.0001</b> | 30/21 vs 61/35   | 0.57            | 21.3 vs 21.4 | 0.81            | 134 vs 146.7             | 0.09            | 187.5 vs 133.6 | 0.46            | NA                         | -               |
| 4  | Hendi [23] | 75.7 (4.9) vs 55.7 (10.8)    | <b>&lt;0.0001</b> | 37/24 vs 107/69  | 0.89            | 22.2 vs 23.1 | 0.78            | NA                       | -               | NA             | -               | NA                         | -               |
| 5  | Ke [24]    | >65 (NA) vs <65 (NA)         | NA                | 45/30 vs 120/105 | 0.32            | 22.8 vs 23.2 | 0.34            | 110.9 vs 105.3           | 0.49            | 92.1 vs 86.3   | 0.26            | 26.7 vs 28.4               | 0.77            |
| 6  | Liu [4]    | 77.0 (3) vs 57.9 (12.4)      | <b>&lt;0.0001</b> | 47/30 vs 209/145 | 0.75            | 22.8 vs 23.8 | <b>0.01</b>     | NA                       | -               | NA             | -               | NA                         | -               |
| 7  | Tan [25]   | 75.2 (4.4) vs 60.7 (7.5)     | <b>&lt;0.0001</b> | 33/23 vs 51/33   | 0.83            | 22.2 vs 23.3 | <b>0.02</b>     | NA                       | -               | NA             | -               | NA                         | -               |

  

| n. | Author     | ASA I/II (%) | <i>p</i> -value   | ASA III/IV (%) | <i>p</i> -value   | Overall Comorbidity (%) | <i>p</i> -value | Hypertension (%) | <i>p</i> -value   | CAD (%)    | <i>p</i> -value | Diabetes     | <i>p</i> -value |
|----|------------|--------------|-------------------|----------------|-------------------|-------------------------|-----------------|------------------|-------------------|------------|-----------------|--------------|-----------------|
| 1  | Buchs [21] | NA           | -                 | NA             | -                 | NA                      | -               | 53.3 vs 53.8     | 1.00              | 20 vs 11.5 | 0.65            | 20 vs 15.4   | 0.69            |
| 2  | Liang [10] | 70.4 vs 98.2 | <b>&lt;0.0001</b> | 29.6 vs 1.8    | <b>&lt;0.0001</b> | NA                      | -               | NA               | -                 | NA         | -               | NA           | -               |
| 3  | Cai [22]   | 70.6 vs 75   | 0.57              | 29.4 vs 25     | 0.57              | 62.7 vs 36.5            | <b>0.002</b>    | NA               | -                 | NA         | -               | NA           | -               |
| 4  | Hendi [23] | 82 vs 96.6   | <b>0.001</b>      | 18 vs 3.4      | <b>0.001</b>      | 68.9 vs 34.6            | <b>0.0001</b>   | 41 vs 22.2       | <b>0.007</b>      | 6.6 vs 1.1 | <b>0.04</b>     | NA           | -               |
| 5  | Ke [24]    | 76 vs 96     | <b>&lt;0.0001</b> | 24 vs 4        | <b>&lt;0.0001</b> | NA                      | -               | 17.3 vs 10.7     | 0.13              | 12 vs 2.2  | 0.33            | 12 vs 9.8    | 0.58            |
| 6  | Liu [4]    | 66.2 vs 99.7 | <b>&lt;0.0001</b> | 33.8 vs 0.3    | <b>&lt;0.0001</b> | 49.3 vs 28.2            | NA              | 63.6 vs 30.8     | <b>&lt;0.0001</b> | 22.1 vs 13 | 0.16            | 23.3 vs 19.2 | 0.41            |
| 7  | Tan [25]   | 66.1 vs 78.6 | 0.10              | 33.9 vs 21.4   | 0.10              | NA                      | -               | NA               | -                 | NA         | -               | NA           | -               |

  

| n. | Author     | Lung disease (%) | <i>p</i> -value | Benign disease (%) | <i>p</i> -value | Malignant disease (%) | <i>p</i> -value | Max tumor diameter (%) | <i>p</i> -value | Whipple procedure (%) | <i>p</i> -value | Pylorus preserving (%) | <i>p</i> -value |
|----|------------|------------------|-----------------|--------------------|-----------------|-----------------------|-----------------|------------------------|-----------------|-----------------------|-----------------|------------------------|-----------------|
| 1  | Buchs [21] | 0 vs 11.5        | 0.28            | 26.7 vs 23.1       | 1.00            | 73.3 vs 76.9          | 1.00            | NA                     | -               | 80 vs 53.8            | 0.18            | 20 vs 46.2             | 0.18            |
| 2  | Liang [10] | NA               | -               | 11.1 vs 34.5       | <b>0.03</b>     | 88.9 vs 65.5          | <b>0.03</b>     | 2.6 vs 2.8             | 0.55            | 100 vs 100            | 1.00            | 0 vs 0                 | 1.00            |
| 3  | Cai [22]   | NA               | -               | 0 vs 0             | 1.00            | 100 vs 100            | 1.00            | 3.1 vs 3.3             | 0.30            | NA                    | -               | NA                     | -               |
| 4  | Hendi [23] | NA               | -               | 64 vs 20           | 0.76            | 36 vs 80              | 0.76            | 2.4 vs 2.3             | 0.86            | 100 vs 100            | 1.00            | 0 vs 0                 | 1.00            |
| 5  | Ke [24]    | 2.7 vs 0.44      | 0.16            | 5.3 vs 25.3        | <b>0.001</b>    | 94.7 vs 74.7          | <b>0.001</b>    | 2.3 vs 2.6             | 0.42            | 100 vs 100            | 1.00            | 0 vs 0                 | 1.00            |
| 6  | Liu [4]    | 10.4 vs 5.9      | 0.16            | 7.2 vs 19.2        | 0.11            | 92.2 vs 80.8          | 0.11            | NA                     | -               | 100 vs 100            | 1.00            | 0 vs 0                 | 1.00            |
| 7  | Tan [25]   | NA               | -               | 33.3 vs 21.4       | 1.00            | 66.7 vs 78.6          | 1.00            | 2.9 vs 2.3             | -               | 100 vs 100            | 1.00            | 0 vs 0                 | 1.00            |

  

| n. | Author     | TMN 1a (%)  | <i>p</i> -value | TMN 1b (%)   | <i>p</i> -value | TMN 2a (%)   | <i>p</i> -value | TMN 2b (%)  | <i>p</i> -value | TMN 3 (%)  | <i>p</i> -value | TMN 4 (%) | <i>p</i> -value |
|----|------------|-------------|-----------------|--------------|-----------------|--------------|-----------------|-------------|-----------------|------------|-----------------|-----------|-----------------|
| 1  | Buchs [21] | 9.1 vs 5    | 1.00            | 18.2 vs 20   | 1.00            | 27.3 vs 35   | 1.00            | 27.3 vs 35  | 1.00            | 18.2 vs 5  | 0.25            | 0 vs 0    | -               |
| 2  | Liang [10] | NA          | -               | NA           | -               | NA           | -               | NA          | -               | NA         | -               | NA        | -               |
| 3  | Cai [22]   | 11.8 vs 8.3 | 0.59            | 60.8 vs 59.3 | 0.59            | 13.7 vs 16.7 | 0.59            | 9.8 vs 12.5 | 0.59            | 3.9 vs 3.2 | 0.59            | 0 vs 0    | -               |
| 4  | Hendi [23] | NA          | -               | NA           | -               | NA           | -               | NA          | -               | NA         | -               | NA        | -               |
| 5  | Ke [24]    | NA          | -               | NA           | -               | NA           | -               | NA          | -               | NA         | -               | NA        | -               |
| 6  | Liu [4]    | NA          | -               | NA           | -               | NA           | -               | NA          | -               | NA         | -               | NA        | -               |
| 7  | Tan [25]   | NA          | -               | NA           | -               | NA           | -               | NA          | -               | NA         | -               | NA        | -               |
