# Supplementary material for: Minimally Invasive Pancreaticoduodenectomy in Elderly versus Younger Patients: A Meta-Analysis
Source: MDPI journal article supplement (doi:10.3390/cancers16020323), 2024-01-11
Supplement: s1 [file s1]

| Search number,Query,Sort By,Filters,Search Details,Results,Time                                                                                                                                                                                                                                                                                                                                                                                                                                                                                                                                                                                                                                                                                                                                                                                                                                                                                                                                                                                                                                                                                                                                                                                                                                   |
|---------------------------------------------------------------------------------------------------------------------------------------------------------------------------------------------------------------------------------------------------------------------------------------------------------------------------------------------------------------------------------------------------------------------------------------------------------------------------------------------------------------------------------------------------------------------------------------------------------------------------------------------------------------------------------------------------------------------------------------------------------------------------------------------------------------------------------------------------------------------------------------------------------------------------------------------------------------------------------------------------------------------------------------------------------------------------------------------------------------------------------------------------------------------------------------------------------------------------------------------------------------------------------------------------|
| <p>13,((pancreaticoduodenectomy) AND (laparoscopic OR robotic OR minimally invasive)) AND (elderly OR older),,,"('pancreaticoduodenectomy'[MeSH Terms] OR 'pancreaticoduodenectomy'[All Fields] OR 'pancreaticoduodenectomies'[All Fields]) AND ('laparoscopes'[MeSH Terms] OR 'laparoscopes'[All Fields] OR 'laparoscope'[All Fields] OR 'laparoscopical'[All Fields] OR 'laparoscopically'[All Fields] OR 'laparoscopies'[All Fields] OR 'laparoscopy'[MeSH Terms] OR 'laparoscopy'[All Fields] OR 'laparoscopic'[All Fields] OR ('robot'[All Fields] OR 'robot s'[All Fields] OR 'robotically'[All Fields] OR 'robotics'[MeSH Terms] OR 'robotics'[All Fields] OR 'robotic'[All Fields] OR 'robotization'[All Fields] OR 'robotized'[All Fields] OR 'robots'[All Fields]) OR ('minimally'[All Fields] AND ('invasibility'[All Fields] OR 'invasible'[All Fields] OR 'invasion'[All Fields] OR 'invasions'[All Fields] OR 'invasive'[All Fields] OR 'invasively'[All Fields] OR 'invasiveness'[All Fields] OR 'invasives'[All Fields] OR 'invasivity'[All Fields]))) AND ('aged'[MeSH Terms] OR 'aged'[All Fields] OR 'elderly'[All Fields] OR 'elderlies'[All Fields] OR 'elderly s'[All Fields] OR 'elderlys'[All Fields] OR ('older'[All Fields] OR 'olders'[All Fields]))",612,09:49:18</p> |
| <p>12,((pancreaticoduodenectomy) AND (laparoscopic OR robotic)) AND (elderly OR older),,,"('pancreaticoduodenectomy'[MeSH Terms] OR 'pancreaticoduodenectomy'[All Fields] OR 'pancreaticoduodenectomies'[All Fields]) AND ('laparoscopes'[MeSH Terms] OR 'laparoscopes'[All Fields] OR 'laparoscope'[All Fields] OR 'laparoscopical'[All Fields] OR 'laparoscopically'[All Fields] OR 'laparoscopies'[All Fields] OR 'laparoscopy'[MeSH Terms] OR 'laparoscopy'[All Fields] OR 'laparoscopic'[All Fields] OR ('robot'[All Fields] OR 'robot s'[All Fields] OR 'robotically'[All Fields] OR 'robotics'[MeSH Terms] OR 'robotics'[All Fields] OR 'robotic'[All Fields] OR 'robotization'[All Fields] OR 'robotized'[All Fields] OR 'robots'[All Fields])) AND ('aged'[MeSH Terms] OR 'aged'[All Fields] OR 'elderly'[All Fields] OR 'elderlies'[All Fields] OR 'elderly s'[All Fields] OR 'elderlys'[All Fields] OR ('older'[All Fields] OR 'olders'[All Fields]))",553,09:39:03</p>                                                                                                                                                                                                                                                                                                                |
| <p>9,((pancreaticoduodenectomy) AND (minimally invasive)) AND (elderly),,,"('pancreaticoduodenectomy'[MeSH Terms] OR 'pancreaticoduodenectomy'[All Fields] OR 'pancreaticoduodenectomies'[All Fields]) AND ('minimally'[All Fields] AND ('invasibility'[All Fields] OR 'invasible'[All Fields] OR 'invasion'[All Fields] OR 'invasions'[All Fields] OR 'invasive'[All Fields] OR 'invasively'[All Fields] OR 'invasiveness'[All Fields] OR 'invasives'[All Fields] OR 'invasivity'[All Fields])) AND ('aged'[MeSH Terms] OR 'aged'[All Fields] OR 'elderly'[All Fields] OR 'elderlies'[All Fields] OR 'elderly s'[All Fields] OR 'elderlys'[All Fields]))",232,09:33:26</p>                                                                                                                                                                                                                                                                                                                                                                                                                                                                                                                                                                                                                       |
| <p>8,((pancreaticoduodenectomy) AND (elderly)) AND (laparoscopic),,,"('pancreaticoduodenectomy'[MeSH Terms] OR 'pancreaticoduodenectomy'[All Fields] OR 'pancreaticoduodenectomies'[All Fields]) AND ('aged'[MeSH Terms] OR 'aged'[All Fields] OR 'elderly'[All Fields] OR 'elderlies'[All Fields] OR 'elderly s'[All Fields] OR 'elderlys'[All Fields]) AND ('laparoscopes'[MeSH Terms] OR 'laparoscopes'[All Fields] OR 'laparoscope'[All Fields] OR 'laparoscopical'[All Fields] OR 'laparoscopically'[All Fields] OR 'laparoscopies'[All Fields] OR 'laparoscopy'[MeSH Terms] OR 'laparoscopy'[All Fields] OR 'laparoscopic'[All Fields]))",463,09:32:50</p>                                                                                                                                                                                                                                                                                                                                                                                                                                                                                                                                                                                                                                  |
| <p>7,((pancreaticoduodenectomy) AND (elderly)) AND (robot),,,"('pancreaticoduodenectomy'[MeSH Terms] OR 'pancreaticoduodenectomy'[All Fields] OR 'pancreaticoduodenectomies'[All Fields]) AND ('aged'[MeSH Terms] OR 'aged'[All Fields] OR 'elderly'[All Fields] OR 'elderlies'[All Fields] OR 'elderly s'[All Fields] OR 'elderlys'[All Fields]) AND ('robot'[All Fields] OR 'robot s'[All Fields] OR 'robotically'[All Fields] OR 'robotics'[MeSH Terms] OR 'robotics'[All Fields] OR 'robotic'[All Fields] OR 'robotization'[All Fields] OR 'robotized'[All Fields] OR 'robots'[All Fields])",171,09:32:29</p>                                                                                                                                                                                                                                                                                                                                                                                                                                                                                                                                                                                                                                                                                 |
| <p>6,((pancreaticoduodenectomy) AND (elderly)) AND (young),,,"('pancreaticoduodenectomy'[MeSH Terms] OR 'pancreaticoduodenectomy'[All Fields] OR 'pancreaticoduodenectomies'[All Fields]) AND ('aged'[MeSH Terms] OR 'aged'[All Fields] OR 'elderly'[All Fields] OR 'elderlies'[All Fields] OR 'elderly s'[All Fields] OR 'elderlys'[All Fields]) AND ('young'[All Fields] OR 'youngs'[All Fields])</p>                                                                                                                                                                                                                                                                                                                                                                                                                                                                                                                                                                                                                                                                                                                                                                                                                                                                                           |

|                                                                                                                                                                                                                                                                                                                                                                                                                                                                                                            |
|------------------------------------------------------------------------------------------------------------------------------------------------------------------------------------------------------------------------------------------------------------------------------------------------------------------------------------------------------------------------------------------------------------------------------------------------------------------------------------------------------------|
| Fields])",560,09:31:40                                                                                                                                                                                                                                                                                                                                                                                                                                                                                     |
| 5,(pancreaticoduodenectomy) AND (elderly),,,"""pancreaticoduodenectomy""[MeSH Terms] OR ""pancreaticoduodenectomy""[All Fields] OR ""pancreaticoduodenectomies""[All Fields]) AND (""aged""[MeSH Terms] OR ""aged""[All Fields] OR ""elderly""[All Fields] OR ""elderlies""[All Fields] OR ""elderly s""[All Fields] OR ""elderlys""[All Fields])",7,602",09:31:21                                                                                                                                         |
| 4,minimally invasive pancreaticoduodenectomy,,, ""minimally""[All Fields] AND (""invasibility""[All Fields] OR ""invasive""[All Fields] OR ""invasion""[All Fields] OR ""invasions""[All Fields] OR ""invasive""[All Fields] OR ""invasively""[All Fields] OR ""invasiveness""[All Fields] OR ""invasives""[All Fields] OR ""invasivity""[All Fields]) AND (""pancreaticoduodenectomy""[MeSH Terms] OR ""pancreaticoduodenectomy""[All Fields] OR ""pancreaticoduodenectomies""[All Fields])",608,09:30:23 |
| 3,robotic pancreaticoduodenectomy,,, (""robot""[All Fields] OR ""robot s""[All Fields] OR ""robotically""[All Fields] OR ""robotics""[MeSH Terms] OR ""robotics""[All Fields] OR ""robotic""[All Fields] OR ""robotization""[All Fields] OR ""robotized""[All Fields] OR ""robots""[All Fields]) AND (""pancreaticoduodenectomy""[MeSH Terms] OR ""pancreaticoduodenectomy""[All Fields] OR ""pancreaticoduodenectomies""[All Fields])",483,09:30:03                                                       |
| 2,laparoscopic pancreaticoduodenectomy,,, (""laparoscopes""[MeSH Terms] OR ""laparoscopes""[All Fields] OR ""laparoscope""[All Fields] OR ""laparoscopical""[All Fields] OR ""laparoscopically""[All Fields] OR ""laparoscopies""[All Fields] OR ""laparoscopy""[MeSH Terms] OR ""laparoscopy""[All Fields] OR ""laparoscopic""[All Fields]) AND (""pancreaticoduodenectomy""[MeSH Terms] OR ""pancreaticoduodenectomy""[All Fields] OR ""pancreaticoduodenectomies""[All Fields])",1,097",09:29:49        |
| 1,pancreaticoduodenectomy,,, ""pancreaticoduodenectomy""[MeSH Terms] OR ""pancreaticoduodenectomy""[All Fields] OR ""pancreaticoduodenectomies""[All Fields]",13,213",09:29:24                                                                                                                                                                                                                                                                                                                             |
