# Supplementary material for: Minimally Invasive Pancreaticoduodenectomy in Elderly versus Younger Patients: A Meta-Analysis
Source: Cancers (Basel). 2024 Jan 11;16(2):323. doi: 10.3390/cancers16020323 (PMC10813942; doi:10.3390/cancers16020323)
Supplement: Supplementary file 1 [file cancers-16-00323-s001.zip]

Archive with 5 entries (5 files):
- Supplementary file S1 - PRISMA_2020_checklist.pdf
- Supplementary file S2 - MOOSE_Checklist.pdf
- Supplementary file S3 - Search History.pdf
- Supplementary file S4 - Publication Bias Funnel Plot.pdf
- Supplementary file S5 - Individual studies' characteristics.pdf
